# Supplementary material for: Antibacterial Activity of Syzygium aromaticum (Clove) Bud Oil and Its Interaction with Imipenem in Controlling Wound Infections in Rats Caused by Methicillin-Resistant Staphylococcus aureus
Source: MDPI journal article supplement (doi:10.3390/molecules27238551), 2022-12-05
Supplement: s1 [file s1]

**Table S1.** Antibiotic resistance profile of MRSA

| <b>Antibiotic</b>  | <b>Concentration (mcg/ml)</b> | <b>Result</b> |
|--------------------|-------------------------------|---------------|
| Amikacin           | 32                            | Resistant     |
| Amoxicillin/K Clav | 4                             | Resistant     |
| Ampicillin         | 8                             | Resistant     |
| Ceftaroline        | 1                             | Resistant     |
| Ciprofloxacin      | 2                             | Resistant     |
| Clindamycin        | 2                             | Resistant     |
| Erythromycin       | 4                             | Resistant     |
| Gentamycin         | 8                             | Resistant     |
| Imipenem           | 2                             | Intermediate  |
| Levofloxacin       | 4                             | Resistant     |
| Linezolid          | 1                             | Sensitive     |
| Minocycline        | 1                             | Sensitive     |
| Oxacillin          | 2                             | Resistant     |
| Tetracycline       | 8                             | Resistant     |
| Trimethoprim/Sulfa | 4/76                          | Resistant     |
| Vancomycin         | 1                             | Sensitive     |

**Table S2.** The fractional inhibitory concentration of clove oil against MRSA

| <b>Bacterial pathogens</b> | <b>Fractional inhibitory concentration</b> |                                |                             |                  | <b>Remarks</b> |
|----------------------------|--------------------------------------------|--------------------------------|-----------------------------|------------------|----------------|
|                            | <b>MIC Oil (µl/ml)</b>                     | <b>MIC of Imipenem (mg/ml)</b> | <b>MIC of Imipenem +oil</b> | <b>FIC Index</b> |                |
| <i>MRSA</i>                | 2.5                                        | 0.004                          | 0.004                       | 1.016            | Indifference   |
